# Supplementary material for: Identification of hub genes in hepatocellular carcinoma using integrated bioinformatic analysis
Source: PubMed Central journal article supplement (PMC7138582; doi:10.18632/aging.102969), 2020-03-26
Supplement: aging-12-102969-s004..pdf [file aging-12-102969-s004..pdf]

SUPPLEMENTARY FIGURES

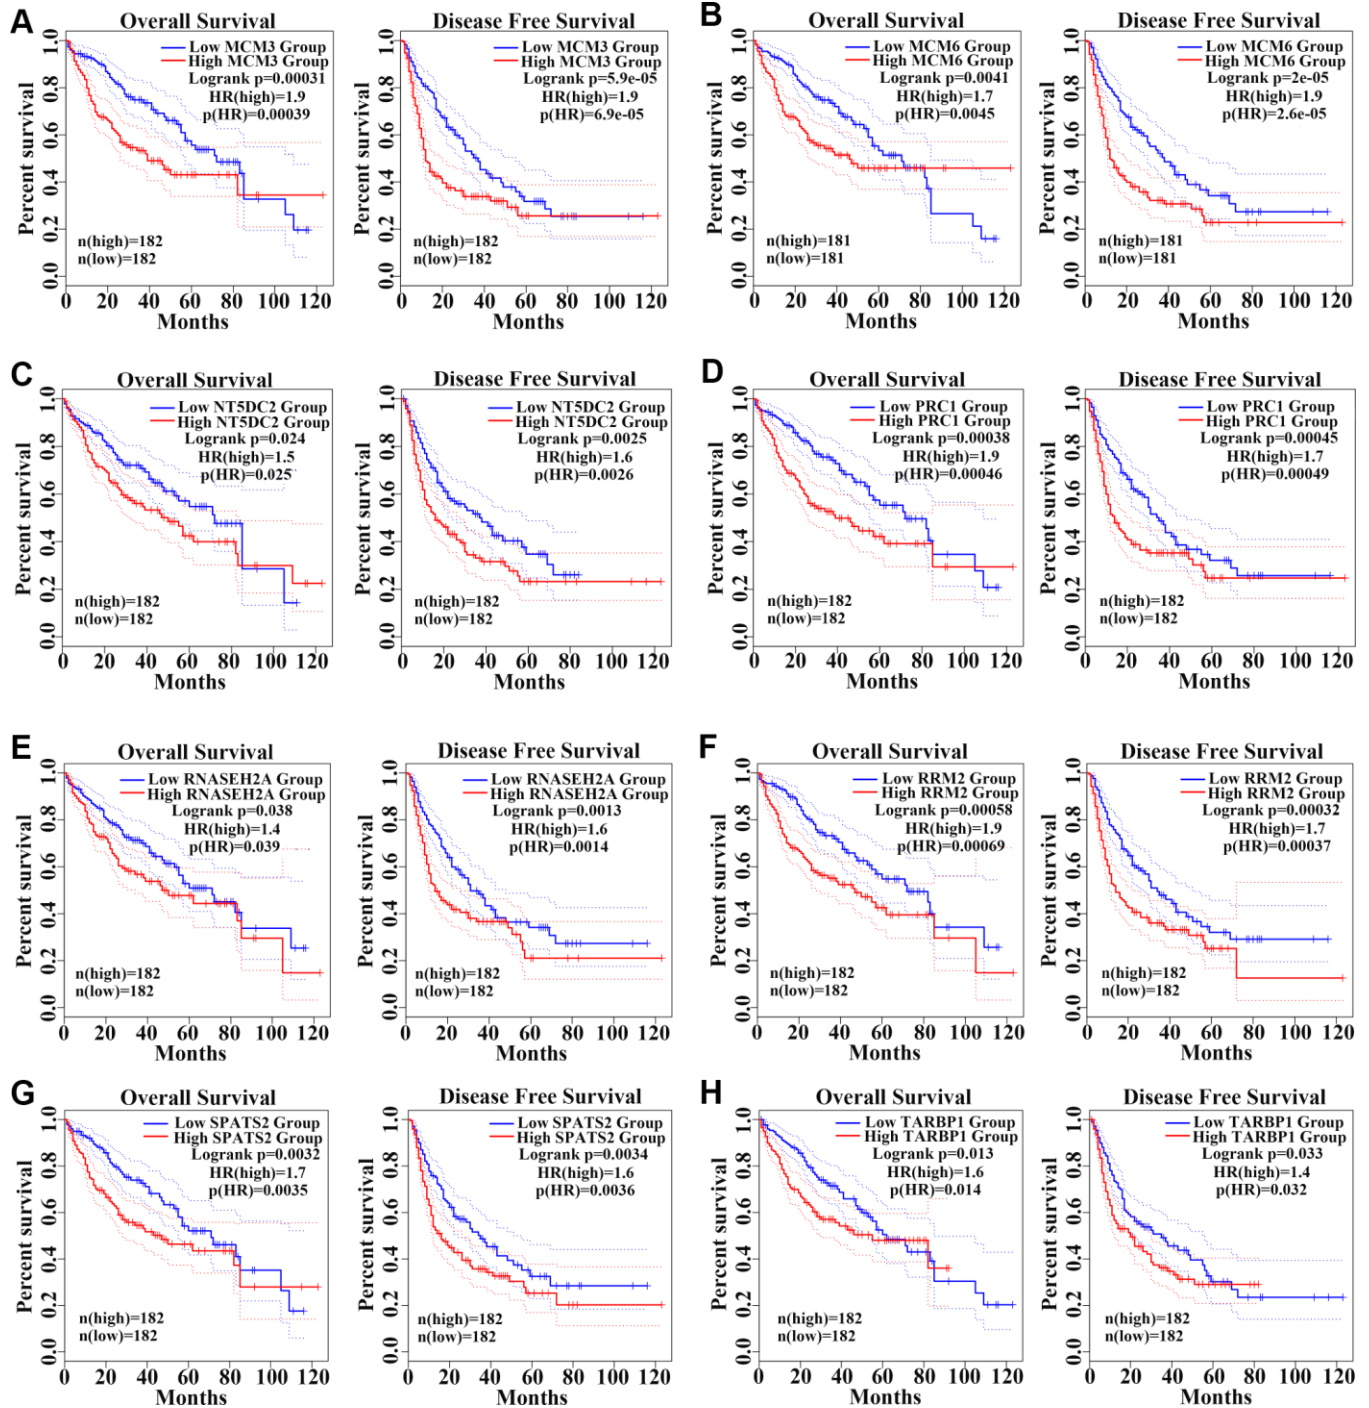

**Supplementary Figure 1. Survival analysis based on upregulated hub genes.** (A–H) Survival analysis of the association between *MCM3* (A), *MCM6* (B), *NT5DC2* (C), *PRC1* (D), *RNASEH2A* (E), *RRM2* (F), *SPATS2* (G), and *TARBP1* (H) expression and overall survival (OS) or disease-free survival (DFS) based on hepatocellular carcinoma (HCC) patients in the TCGA cohort.

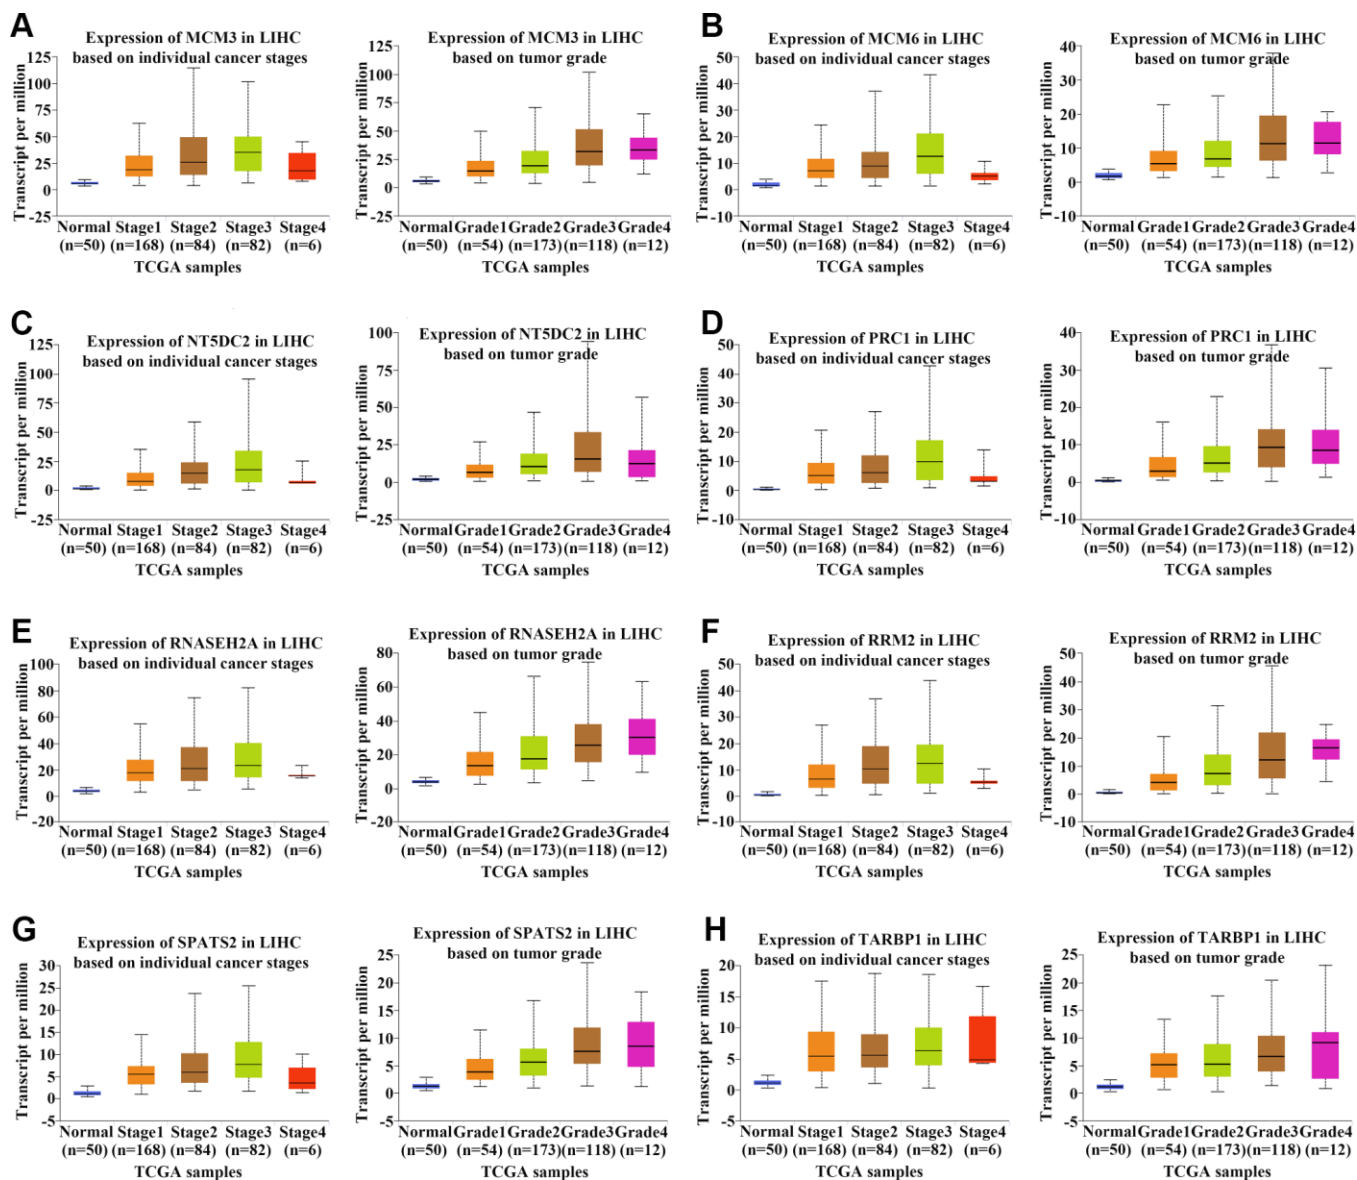

**Supplementary Figure 2. Analysis of clinical features associated with upregulated hub genes.** (A–H) Analysis of the association between *MCM3* (A), *MCM6* (B), *NT5DC2* (C), *PRC1* (D), *RNASEH2A* (E), *RRM2* (F), *SPATS2* (G), and *TARBP1* (H) expression and cancer stage/tumor grade based on hepatocellular carcinoma (HCC) patients in the TCGA cohort. *p*-values are shown in Supplementary Table 3.

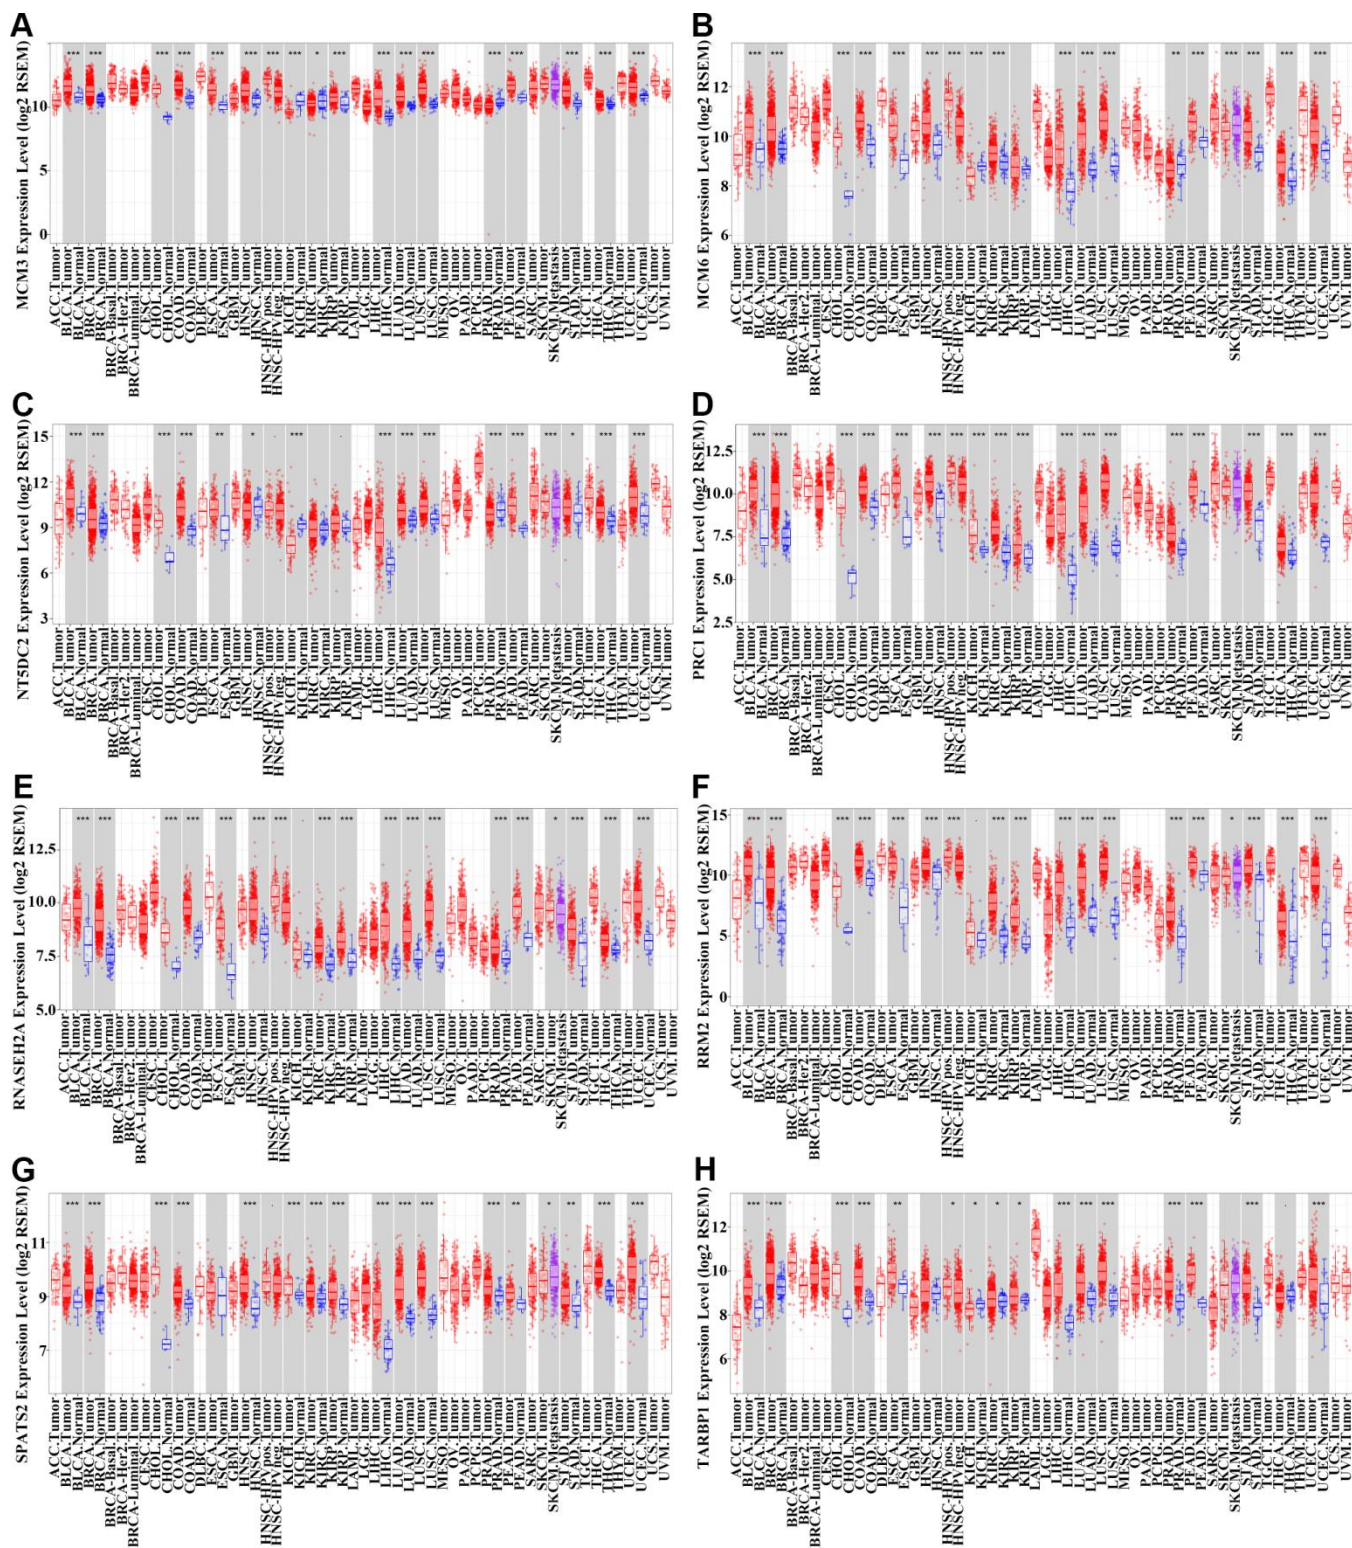

**Supplementary Figure 3. Expression of upregulated hub genes in different types of cancer.** (A–H) Expression of *MCM3* (A), *MCM6* (B), *NT5DC2* (C), *PRC1* (D), *RNASEH2A* (E), *RRM2* (F), *SPATS2* (G), and *TARBP1* (H) in different types of cancer and normal tissues from the TCGA pan-cancer cohort.

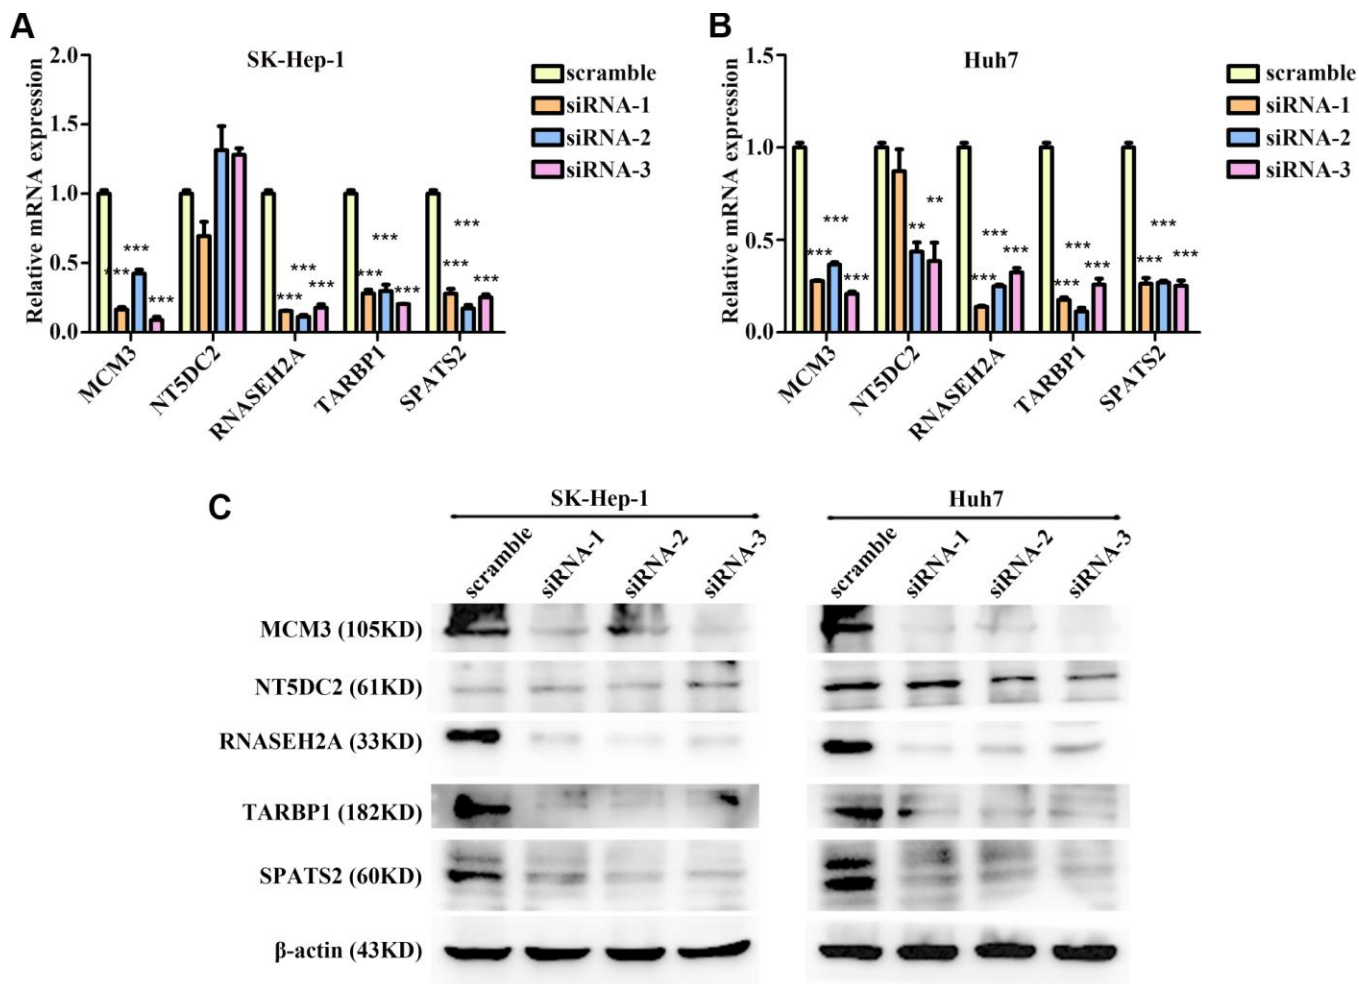

**Supplementary Figure 4. Transfection efficiency verification.** (A-C) Transfection efficiency of siRNA for the five genes in HCC cells according to qRT-PCR (A-B) and western blotting (C) assays. \* $P < 0.05$ ; \*\* $P < 0.01$ ; \*\*\* $P < 0.001$ .

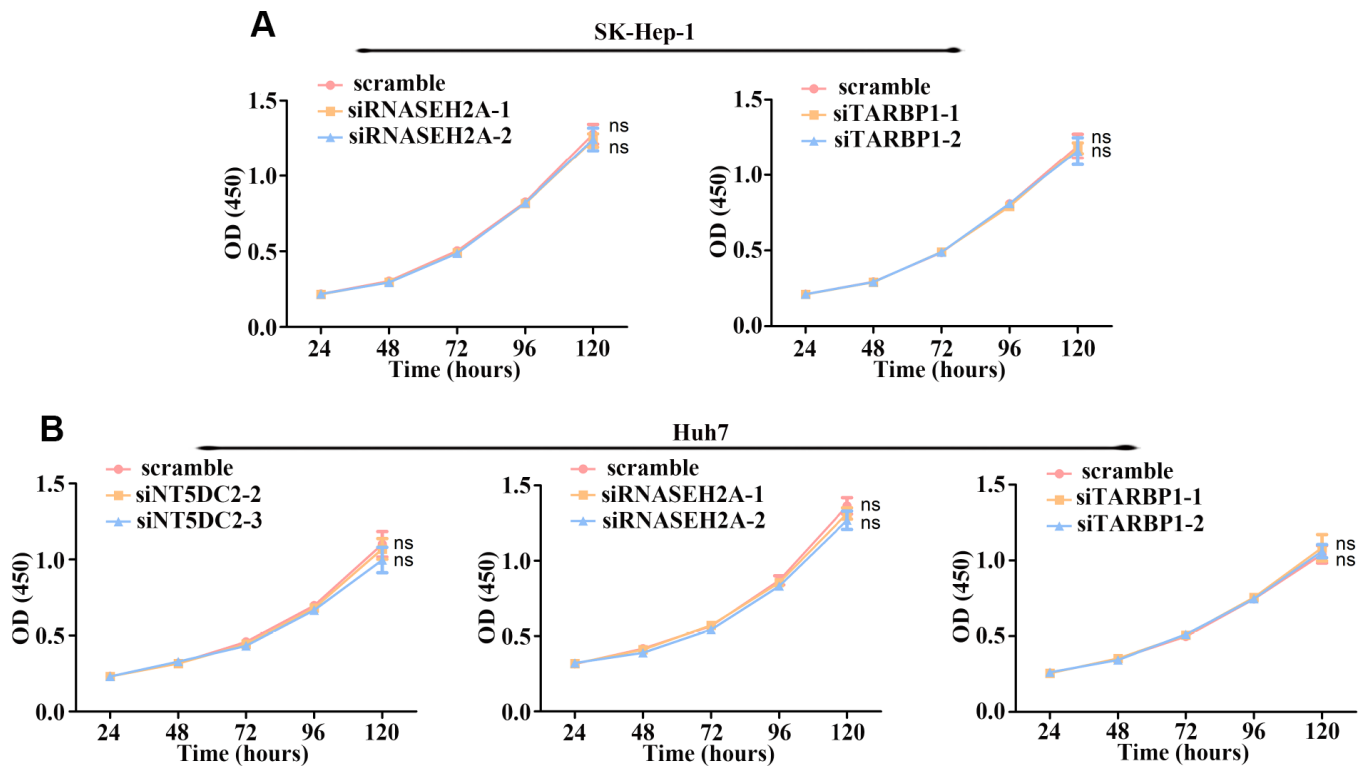

**Supplementary Figure 5. RNASEH2A, TARBP1, and NT5DC2 does not affect HCC cell proliferation.** (A-B) Proliferation of HCC cells with RNASEH2A, TARBP1, or NT5DC2 knockdown according to CCK-8 analysis. ns: no statistical differences.

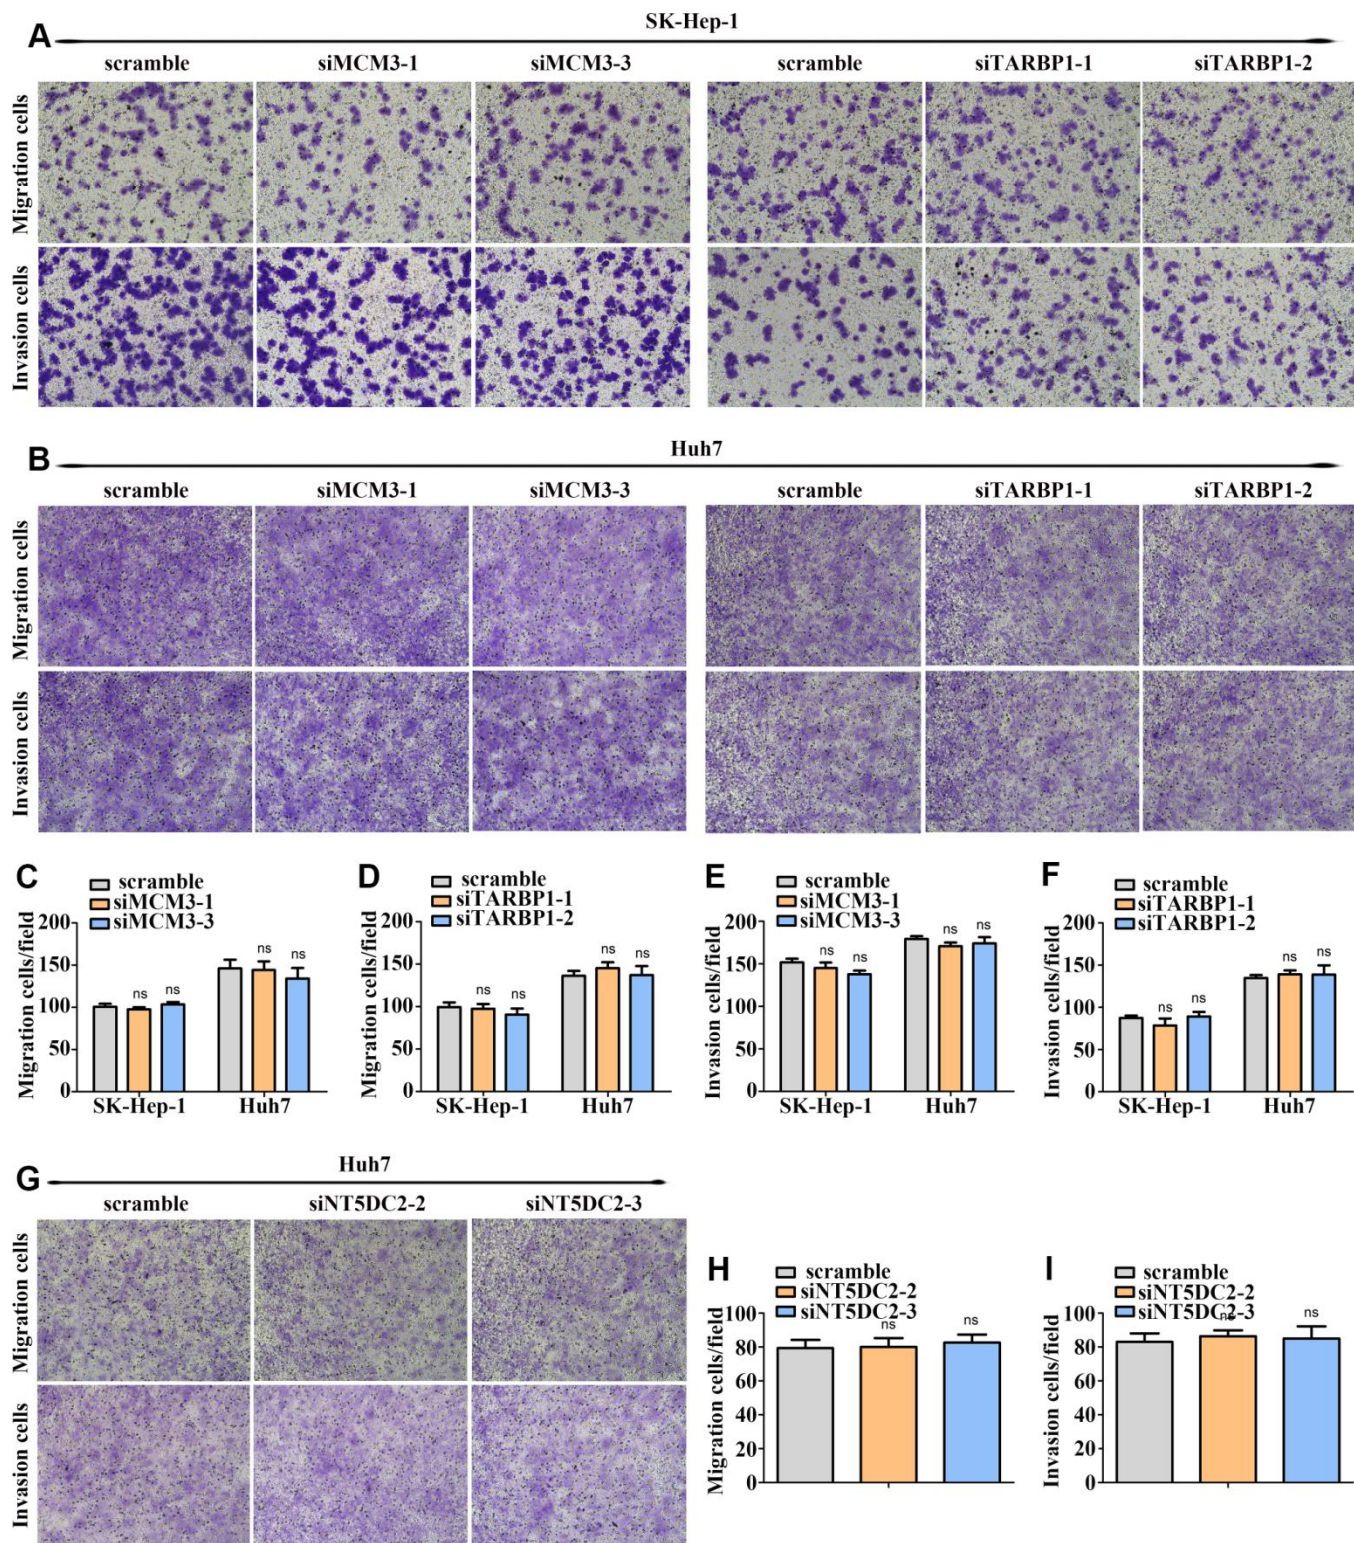

**Supplementary Figure 6. MCM3, TARBP1, and NT5DC2 does not affect HCC cell migration and invasion.** (A-B, and G) HCC cell migration and invasion were evaluated after downregulating the expression of MCM3, TARBP1, or NT5DC2 by Transwell and Boyden assays. (C-F, and H-I) Statistical analysis of Transwell and Boyden assay results. ns: no statistical differences.

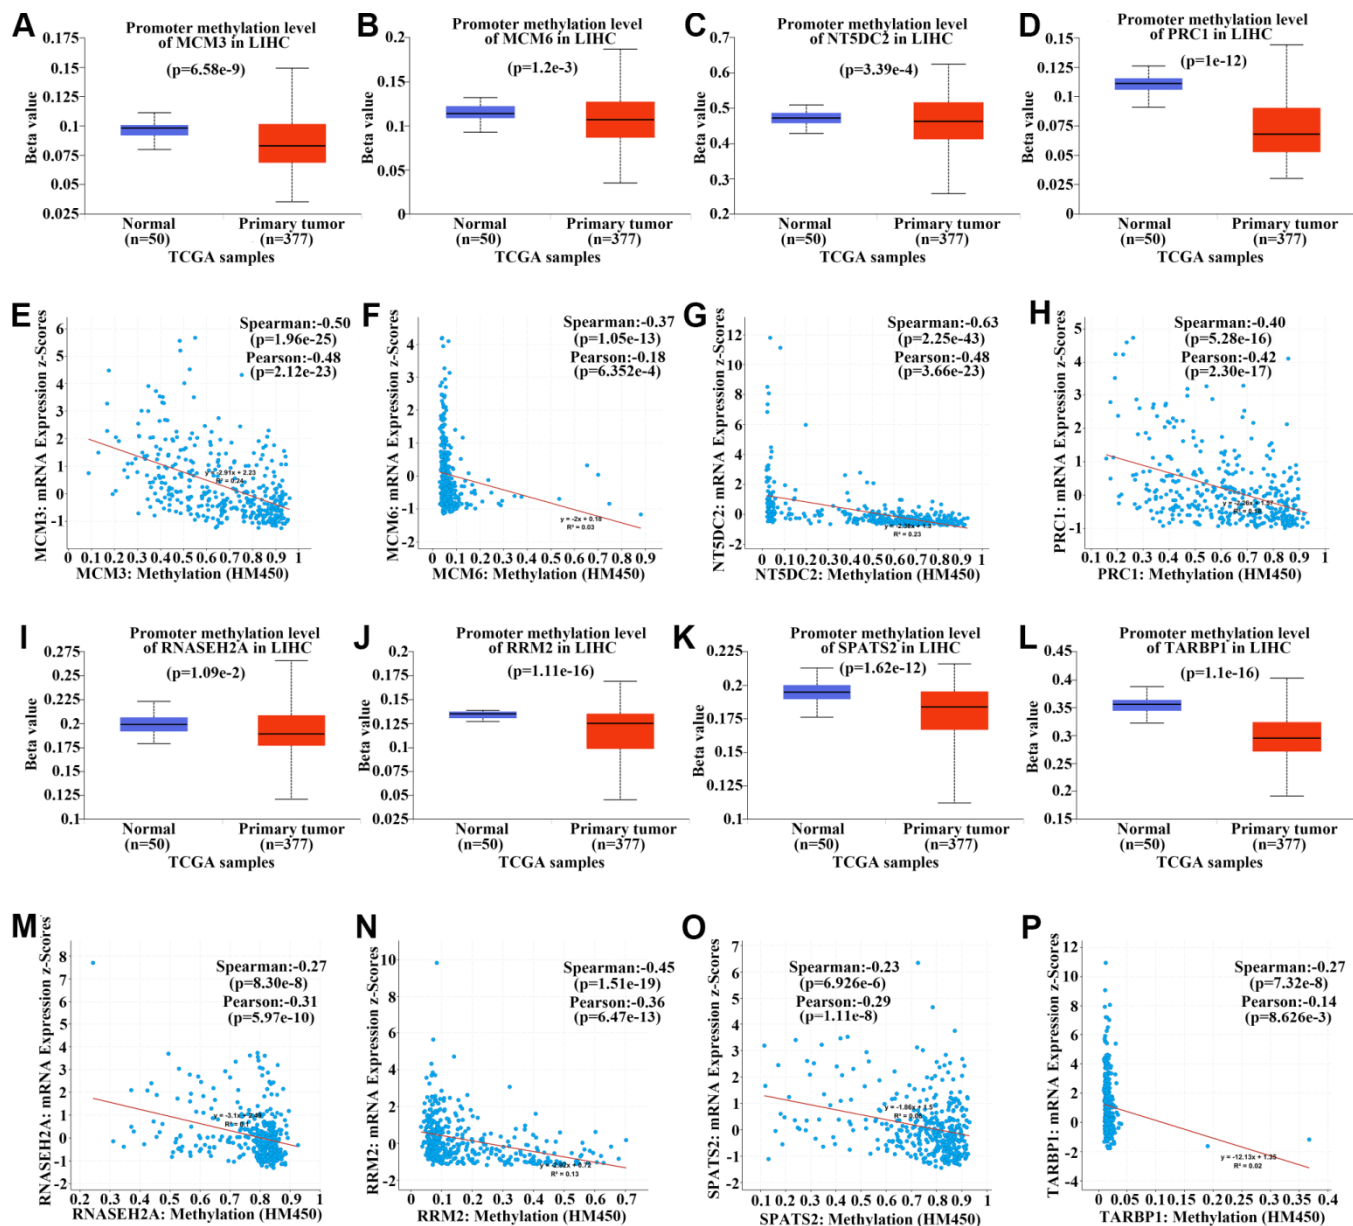

**Supplementary Figure 7. Methylation analysis of upregulated hub genes.** (A–D, I–L) Methylation levels of *MCM3* (A), *MCM6* (B), *NTSDC2* (C), *PRC1* (D), *RNASEH2A* (I), *RRM2* (J), *SPATS2* (K), and *TARBP1* (L) in primary hepatocellular carcinoma (HCC) tumors and normal tissues from the TCGA cohort. (E–H, M–P) Correlation analysis comparing methylation levels of *MCM3* (E), *MCM6* (F), *NTSDC2* (G), *PRC1* (H), *RNASEH2A* (M), *RRM2* (N), *SPATS2* (O), and *TARBP1* (P) with their mRNA expression in HCC based on the TCGA cohort.

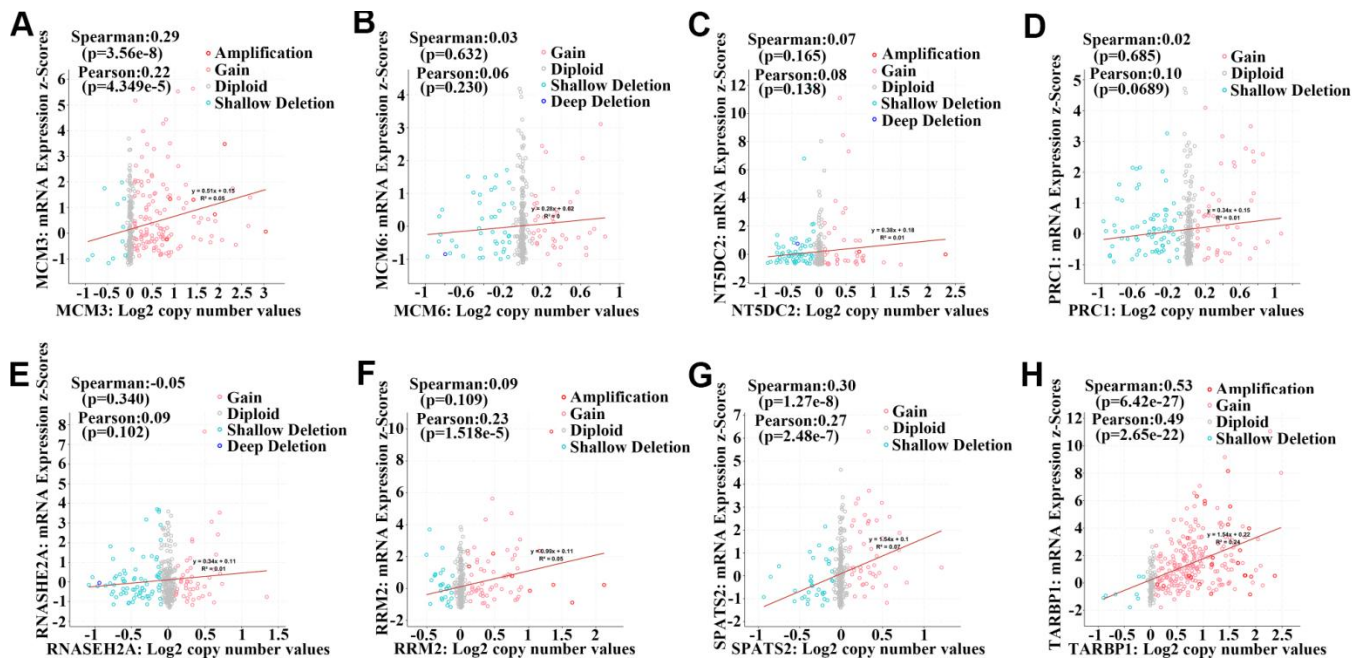

**Supplementary Figure 8. Gene copy number analysis of upregulated hub genes.** (A–H) Correlation analysis of gene copy numbers of *MCM3* (A), *MCM6* (B), *NT5DC2* (C), *PRC1* (D), *RNASEH2A* (E), *RRM2* (F), *SPATS2* (G), and *TARBP1* (H) and their mRNA expression levels in hepatocellular carcinoma (HCC) based on the TCGA cohort.



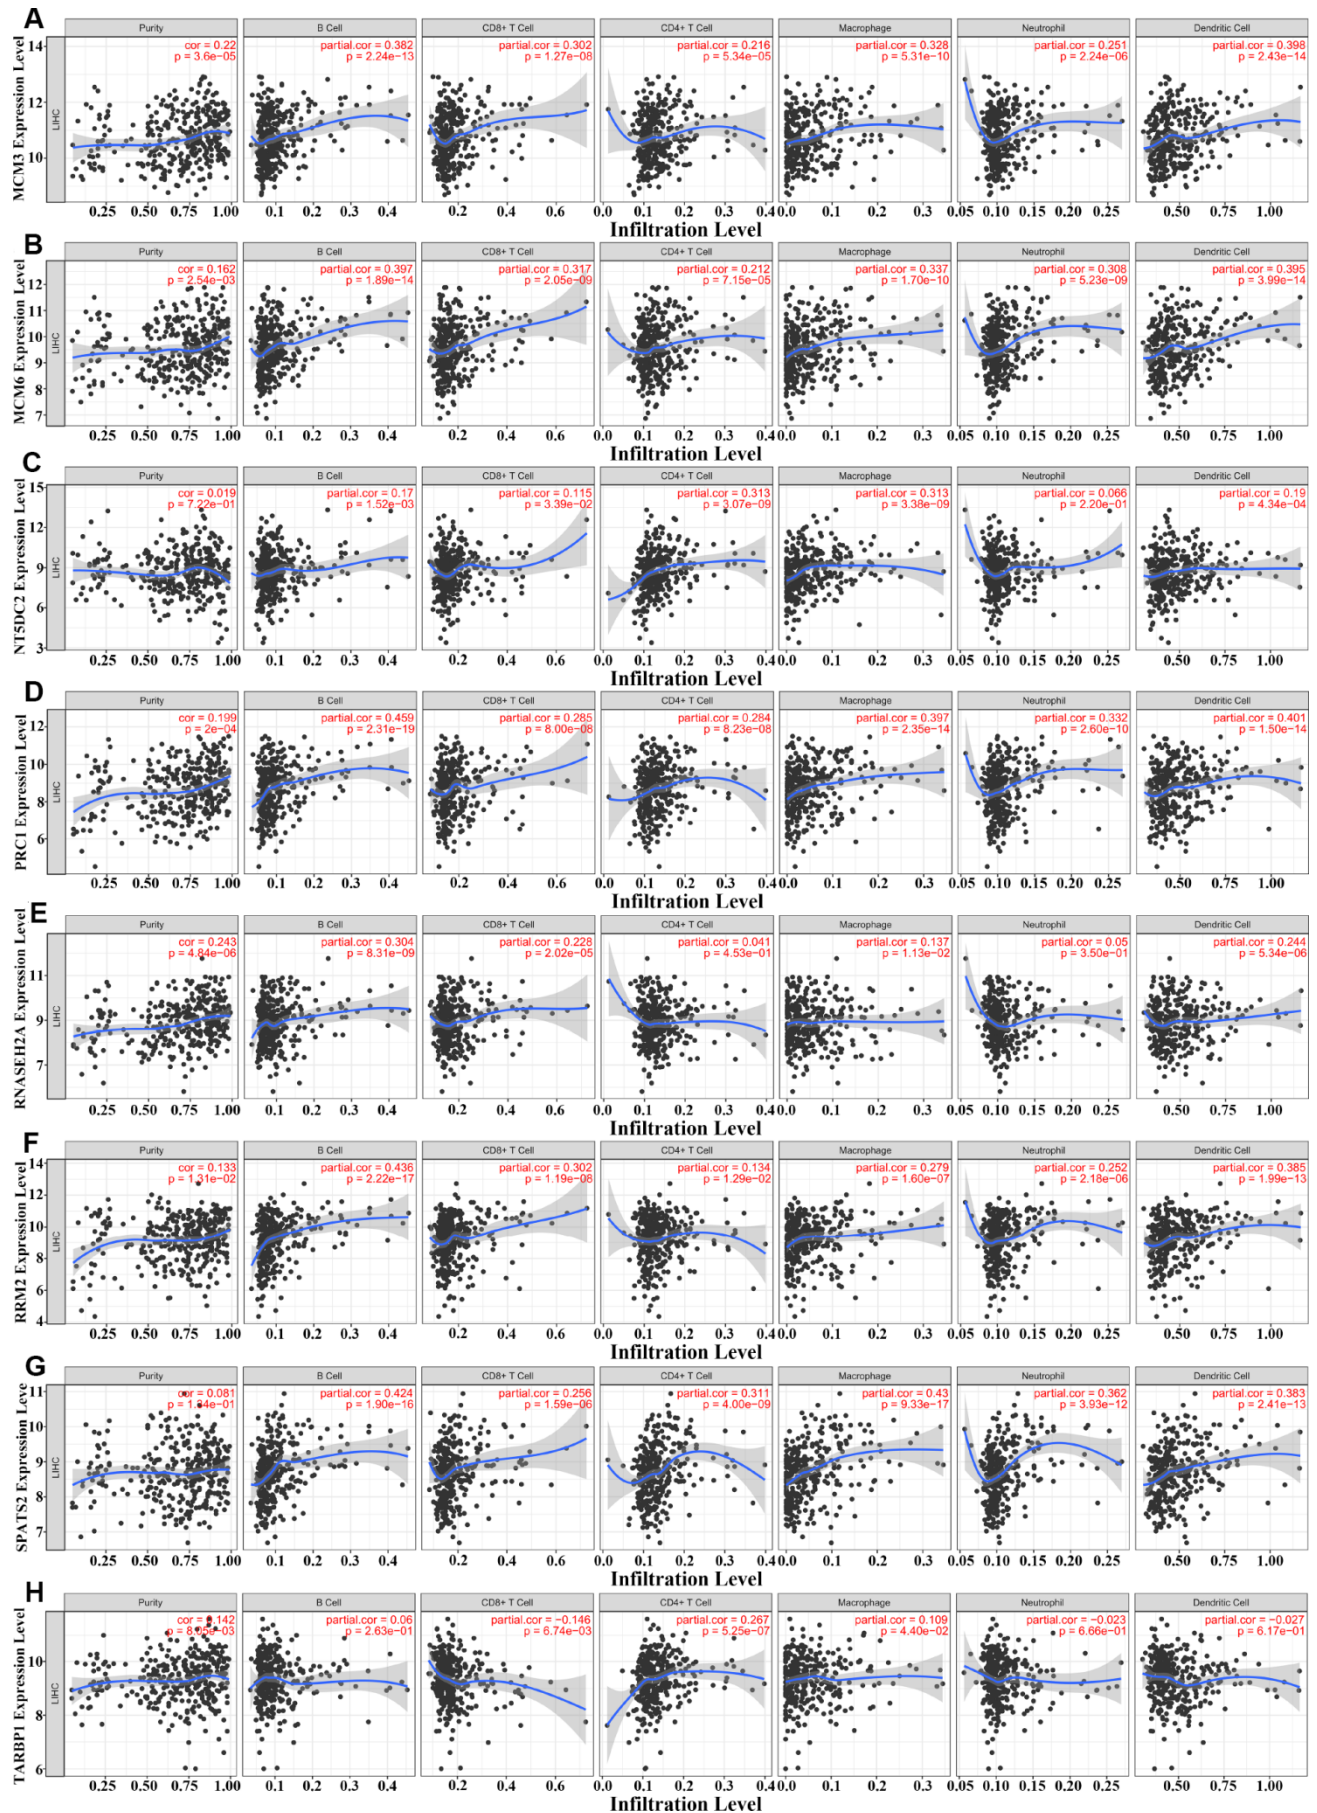

**Supplementary Figure 9. Correlation between levels of hub genes and immune cell infiltration.** Correlation between *MCM3* (A), *MCM6* (B), *NT5DC2* (C), *PRC1* (D), *RNASEH2A* (E), *RRM2* (F), *SPATS2* (G), and *TARBP1* (H) levels and immune cell infiltration in hepatocellular carcinoma (HCC) tissues. Each dot represents a sample in the TCGA cohort.
