# Supplementary material for: Identification of hub genes in hepatocellular carcinoma using integrated bioinformatic analysis
Source: publisher site journal article supplement (doi:10.18632/aging.102969), 2020-03-26
Supplement: Supplementary file [file aging-v12i6-102969-supplementary-material-SD2.pdf]

## SUPPLEMENTARY TABLES

Please browse Full Text version to see the data of Supplementary Table 1.

**Supplementary Table 1. List of 176 common upregulated genes among hepatocellular carcinoma datasets.**

**Supplementary Table 2. List of 57 common upregulated genes with higher protein levels among hepatocellular carcinoma datasets.**

| Gene     |         |          |
|----------|---------|----------|
| CLGN     | MCAM    | MCM4     |
| GPNMB    | PODXL   | MAP2     |
| AKR1B10  | RFC4    | MSH2     |
| KPNA2    | SPATS2  | LRRC1    |
| COL15A1  | LAMC1   | RNASEH2A |
| CDK1     | TARBP1  | COL4A1   |
| FABP5    | STMN1   | CAP2     |
| SORT1    | TP53I3  | GPC3     |
| SULT1C2  | COL4A2  | MCM6     |
| ENAH     | IGF2BP2 | MUC13    |
| MAD2L1   | SRXN1   | SPARC    |
| ATP6V1C1 | PRC1    | LAMA4    |
| MCM3     | LGALS3  | PLVAP    |
| NEDD4L   | RRM2    | PEG10    |
| THY1     | G6PD    | HKDC1    |
| CAPG     | MDK     | DTNA     |
| ROBO1    | FEN1    | ACSL4    |
| MPZL1    | NT5DC2  | TP53BP2  |
| ITGA6    | MCM2    | PSPH     |

Please browse Full Text version to see the data of Supplementary Table 3.

**Supplementary Table 3. Statistical analysis ( $p$ -values) of the expression of 12 upregulated genes comparing different cancer stages/tumor grades.**

**Supplementary Table 4. Primer sequences used in this study.**

| Type    | Gene     | Sequence                      |
|---------|----------|-------------------------------|
| Primers | MCM3     | F 5' TCTGGGACCTTCAGGACTGT 3'  |
|         |          | R 5' TTGATGTCCCCACGGATGTG 3'  |
|         | NT5DC2   | F 5' AGGGGATGAGACGTTTGCTG 3'  |
|         |          | R 5' AAACAGGTTTCCCTGCCGAT 3'  |
|         | SPATS2   | F 5' CTCGGGAGGTATTGCCAGG 3'   |
|         |          | R 5' GCTCCATGCTGACTCCAGTT 3'  |
|         | RNASEH2A | F 5' AGACAATACAGGCCGCTGTC 3'  |
|         |          | R 5' GGGTCTTTGAGTCTGCCACT 3'  |
|         | TARBP1   | F 5' TGGGAAACAGGAGAAAAGTCT 3' |
|         |          | R 5' AGCAAGGGCATGTAGGCATT 3'  |

**Supplementary Table 5. Antibodies used in this study.**

| Gene     | Antibody                                                       |
|----------|----------------------------------------------------------------|
| MCM3     | 1:50 for IHC 1:1000 for WB, from Proteintech, Chicago, IL, USA |
| NT5DC2   | 1:50 for IHC 1:1000 for WB, from Bioss, Beijing, China         |
| SPATS2   | 1:50 for IHC 1:1000 for WB, from Bioss, Beijing, China         |
| RNASEH2A | 1:50 for IHC 1:1000 for WB, from Proteintech, Chicago, IL, USA |
| TARBP1   | 1:1000 for WB, from Abcam, Cambridge, UK                       |
| RRM2     | 1:50 for IHC, from Proteintech, Chicago, IL, USA               |
| LRRC1    | 1:50 for IHC, from Proteintech, Chicago, IL, USA               |
