# Supplementary material for: Identification of hub genes in hepatocellular carcinoma using integrated bioinformatic analysis
Source: Aging (Albany NY). 2020 Mar 26;12(6):5439–68. doi: 10.18632/aging.102969 (PMC7138582; doi:10.18632/aging.102969)
Supplement: Supplementary Table 1 [file aging-12-102969-s001..docx]

**Supplementary Table 1. List of 176 common upregulated genes among hepatocellular carcinoma datasets.**

| **Gene** |
| --- |
| | **CCNB1** | | --- | | **SMYD3** | | **FOXM1** | | **CDK1** | | **MAD2L1** | | **ATP6V1C1** | | **SOX9** | | **KIF4A** | | **SQLE** | | **TCF19** | | **ACLY** | | **TYMS** | | **TMEM106C** | | **MELK** | | **PTP4A3** | | **PODXL** | | **RBP7** | | **NDC80** | | **OIP5** | | **CCNA2** | | **STMN1** | | **CKS2** | | **TP53I3** | | **KIF23** | | **ANXA2** | | **SERPINI1** | | **CCNB2** | | **PRC1** | | **LGALS3** | | **CENPW** | | **G6PD** | | **TXNRD1** | | **MCM2** | | **MCM4** | | **LRRC1** | | **RAP2A** | | **GPC3** | | **CENPK** | | **DTNA** | | **LAPTM4B** | | **NEK2** | | **FANCD2** | | **PSPH** | | **B3GNT5** | | **C1orf106** | | **CLGN** | | **SOX4** | | **GPNMB** | | **AKR1B10** | | **EZH2** | | **ENAH** | | **CAPG** | | **ROBO1** | | **MPZL1** | | **MCAM** | | **SFN** | | **CDC20** | | **RFC4** | | **KDELR3** | | **BUB1** | | **TRIP13** | | **RGS5** | | **UBE2S** | | **UBE2C** | | **MND1** | | **ACSM1** | | **RRM2** | | **TOP2A** | | **FEN1** | | **HELLS** | | **FANCI** | | **SPARCL1** | | **MAP2** | | **S100A10** | | **CAP2** | | **FAM83D** | | **MCM6** | | **LCN2** | | **SPARC** | | **PEG10** | | **CTHRC1** | | **CDKN2A** | | **NOTCH3** | | **TRNP1** | | **CDKN3** | | **CENPM** | | **CENPF** | | **KRT23** | | **CDCA8** | | **TKT** | | **TPX2** | | **C15orf48** | | **NSMCE2** | | **GINS1** | | **ZIC2** | | **KPNA2** | | **ANLN** | | **BIRC5** | | **FABP5** | | **SORT1** | | **RACGAP1** | | **CDC6** | | **SULT1C2** | | **AURKA** | | **AURKB** | | **PAFAH1B3** | | **C1orf198** | | **NEDD4L** | | **BEX2** | | **EPS8L3** | | **THY1** | | **SPP1** | | **ITGA6** | | **ZWINT** | | **NUF2** | | **PTTG1** | | **TARBP1** | | **CDCA5** | | **UBE2T** | | **ECT2** | | **IQGAP3** | | **COL4A2** | | **IGF2BP2** | | **PDGFA** | | **NT5DC2** | | **DLGAP5** | | **RAD51AP1** | | **COL4A1** | | **MKI67** | | **LYZ** | | **CDKN2C** | | **MUC13** | | **PLVAP** | | **KIAA0101** | | **ACSL4** | | **TP53BP2** | | **SPINK1** | | **RFX5** | | **FLVCR1** | | **COL15A1** | | **TRIM31** | | **CDC25C** | | **TUBA1B** | | **MCM3** | | **NCAPG2** | | **KIF2C** | | **VWF** | | **PBK** | | **SPATS2** | | **LAMC1** | | **NCAPH** | | **TK1** | | **ASPM** | | **CDCA3** | | **SRXN1** | | **LOXL2** | | **ATAD2** | | **PEA15** | | **STXBP6** | | **CKAP2** | | **MDK** | | **SPC25** | | **MSH2** | | **BUB1B** | | **OLFML2B** | | **HJURP** | | **RNASEH2A** | | **DTL** | | **HMMR** | | **GMNN** | | **KIF20A** | | **LAMA4** | | **RNF157** | | **HKDC1** | | **NCAPG** | | **NUSAP1** | |
